# Supplementary material for: Microfluidic impedance cytometry device with N-shaped electrodes for lateral position measurement of single cells/particles
Source: Royal Society of Chemistry journal article supplement (doi:10.1039/c9lc00819e), 2019-01-01
Supplement: c9lc00819e1.pdf [file c9lc00819e1.pdf]

## Electronic Supplementary Information (ESI)

### **Microfluidic impedance cytometry with N-shaped electrodes for lateral position measurement of single cells/particles**

Dahou Yang and Ye Ai\*

Pillar of Engineering Product Development, Singapore University of Technology and Design,  
Singapore 487372

\*Corresponding author: Ye Ai ([aiye@sutd.edu.sg](mailto:aiye@sutd.edu.sg)).

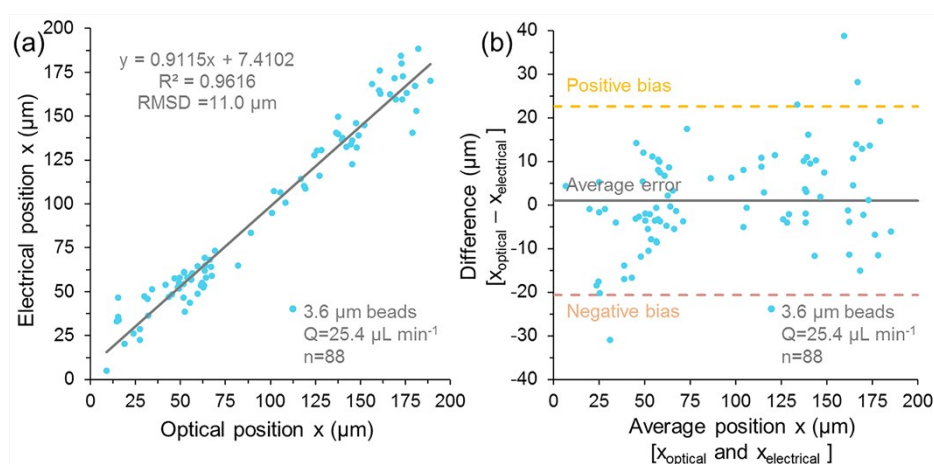

Fig. S1. Quantitative comparisons of the lateral position of 3.6  $\mu\text{m}$  beads between our results and those obtained by the optical method at the flow rate of 25.4  $\mu\text{L min}^{-1}$ . (a) Electrical position  $x$  versus optical position  $x$ , showing the good linear correlation of coefficient of determination:  $R^2 > 0.96$ . Root-mean-square deviation (RMSD) = 11.0  $\mu\text{m}$  (i.e., 5.5% of the channel width). (d) Bland-Altman analysis comparing the lateral position  $x$  obtained by the electrical method and optical method. Most values are well placed between the 95% limits of agreement, which are represented as two dotted lines in the figure.

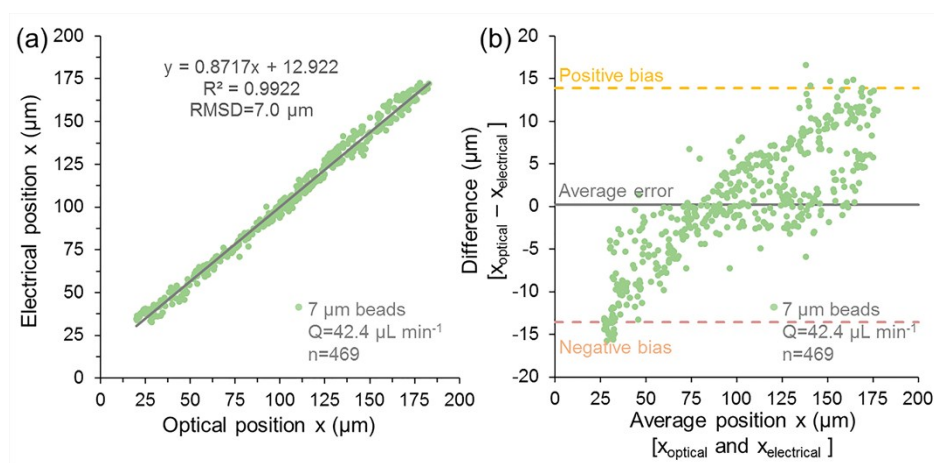

Fig. S2. Quantitative comparisons of the lateral position of 7  $\mu\text{m}$  beads between our results and those obtained by the optical method at the flow rate of 42.4  $\mu\text{L min}^{-1}$ . (a) Electrical position  $x$  versus optical position  $x$ , showing the good linear correlation of coefficient of determination:  $R^2 > 0.99$ . Root-mean-square deviation (RMSD) = 7.0  $\mu\text{m}$  (i.e., 3.5% of the channel width). (d) Bland-Altman analysis comparing the lateral position  $x$  obtained by the electrical method and optical method. Most values are well placed between the 95% limits of agreement, which are represented as two dotted lines in the figure.

**Table S1. Impedance-based Techniques for the Measurement of Particle Lateral Position**

|                                                                                                     | Wang et al. <i>Lab Chip</i> 2017 [Ref. 14]                                        | Solsona et al. <i>Lab Chip</i> 2019 [Ref. 24]                                     | Reale et al. <i>Microfluid. Nanofluid.</i> 2018 [Ref. 25]                         | Reale et al. <i>Lab Chip</i> 2019 [Ref. 26]                                                            | Proposed                                                                                                                |
|-----------------------------------------------------------------------------------------------------|-----------------------------------------------------------------------------------|-----------------------------------------------------------------------------------|-----------------------------------------------------------------------------------|--------------------------------------------------------------------------------------------------------|-------------------------------------------------------------------------------------------------------------------------|
|                                                                                                     | 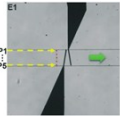 |  |  |                     |                                      |
| <b>Test samples</b>                                                                                 | 6 and 11 μm diameter beads                                                        | 83 μm diameter beads                                                              | 6 and 11 μm diameter beads                                                        | 6 and 7 μm diameter beads<br><br>Human and chicken red blood cells(RBCs)                               | 3.6, 5, 7 and 10 μm diameter beads<br><br>Human red blood cells(RBCs)                                                   |
| <b>Minimum particle size tested</b>                                                                 | 6 μm diameter beads                                                               | 83 μm diameter                                                                    | 6 μm diameter                                                                     | 6 μm diameter                                                                                          | 3.6 μm diameter                                                                                                         |
| <b>Channel dimensions (width × height)</b>                                                          | 188 μm × 17 μm                                                                    | 477 μm × 219 μm                                                                   | 40 μm × 21.5 μm                                                                   | 50 μm × 21.5 μm                                                                                        | 200 μm × 20 μm                                                                                                          |
| <b>Measuring width (channel width)</b>                                                              | 188 μm                                                                            | 477 μm                                                                            | 40 μm                                                                             | 50 μm                                                                                                  | 200 μm                                                                                                                  |
| <b>Working mechanism</b>                                                                            | width (i.e., transit time) and height of peaks through non-parallel electrodes    | peak magnitude through a gradient in the electric field                           | linear estimate utilizing the ratio of transit time by five pairs of electrodes   | a linear mapping used to transform the peak unbalance information to the electrical position estimates | a simple analytic expression derived from the geometry of N-shaped electrodes and resulting differential signal profile |
| <b>Resolution in lateral position detection (normalized as the percentage of the channel width)</b> | 20% (11 μm beads, 2ul/min)                                                        | 12.5% (83 μm beads, relatively low flow rate)                                     | 5.6% (6 μm beads, 10ul/min)                                                       | 4.8 % (Chicken RBCs, 20ul/min)<br>3.8 % (7 μm beads, 20ul/min)<br>6.2 % (Human RBCs, 20ul/min)         | 3.5 % (7 μm beads, 42.4ul/min)<br>5.7% (Human RBCs, 42.4ul /min)<br>5.5% (3.6 μm beads, 25.4ul/min)                     |
| <b>Presented data number</b>                                                                        | N.A.                                                                              | <100                                                                              | >2000                                                                             | >2000                                                                                                  | >2000                                                                                                                   |
| <b>Throughput</b>                                                                                   | Up to 400 cells/s                                                                 | 0.3 cells/s                                                                       | 50-375 cells/s                                                                    | 125-460 cells/s                                                                                        | Up to 800 cells/s                                                                                                       |
| <b>Demonstrated applications</b>                                                                    | distinguishing five lateral beads position induced by sheath flow                 | tracking the beads and measuring the system conductivity                          | monitoring the inertial focusing of beads                                         | monitoring the sheath flows-induced beads/RBCs focusing                                                | monitoring the sheath flows-induced beads focusing                                                                      |

This Table and figures except our work's are adapted from Refs. 14, 24 and 26 with permission from The Royal Society of Chemistry.
